# Supplementary material
Source: publisher site journal article supplement (https://www.cambridge.org/core/services/aop-file-manager/file/5e8db6a690e8ff0adbe20fb7/SJP-IFC-Appendix-3.pdf)

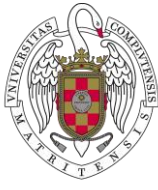

UNIVERSIDAD COMPLUTENSE  
DE MADRID  
FACULTAD DE PSICOLOGÍA

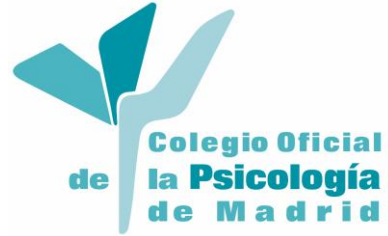

## APPENDIX 3

### SPECIFIC GUIDELINES FOR REPLICATIONS

Direct submission of replications should consider the following:

- (a) Given publication bias, published effect sizes are inflated (i.e.: they are systematically higher than subsequent replications). To achieve adequate replication power, we strongly encourage researchers to double sample size compared to the original study (ideally: 2,5).
- (b) Consider contacting the original authors to request for materials and suggestions for conducting the study. This step is highly encouraged, and we may request documents of the endorsement of the replications by the original authors, but we understand that non-endorsed replications are also relevant for scientific progress.
- (c) Be very specific about adaptation/translation of materials, and specify why these adaptations warrant the theoretical commitment of the direct replication. Ask experts from both cultures/languages if needed.
- (d) Decide instruments based on quality. If a better technique or instrument (e.g.: reliability is significantly improved) for the **same** measure was developed between the publication of the original study and your replication, consider using it. It is important that the scientific community assumes that this new instrument measures the same construct or psychological process.

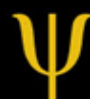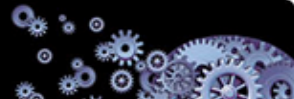

Supplement: Supplementary file 1 [file SJP-IFC-Appendix-3.pdf]
